# Supplementary material for: Using eddy covariance observations to determine the carbon sequestration characteristics of subalpine forests in the Qinghai–Tibet Plateau
Source: Copernicus journal article supplement (doi:10.5194/bg-21-3509-2024), 2024-08-06
Supplement: Supplementary file 1 [file bg-21-3509-2024-supplement.pdf]

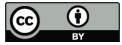

*Supplement of*

**Using eddy covariance observations to determine the carbon sequestration characteristics of subalpine forests in the Qinghai–Tibet Plateau**

**Niu Zhu et al.**

*Correspondence to:* Jinniu Wang ([wangjn@cib.ac.cn](mailto:wangjn@cib.ac.cn))

The copyright of individual parts of the supplement might differ from the article licence.

**Table S1: Site information for eddy covariance study of alpine ecosystems in the Qinghai-Xizang Plateau**

| Article title                                                                                                                                                                  | Latitude | Longitude | Altitude (m) | Ecosystem type | Annual temperature (°C) | Precipitation (mm) | NEE (g C/m <sup>2</sup> /Year) |
|--------------------------------------------------------------------------------------------------------------------------------------------------------------------------------|----------|-----------|--------------|----------------|-------------------------|--------------------|--------------------------------|
| Impacts of the rangeland degradation on CO <sub>2</sub> flux and the underlying mechanisms in the Three-River Source Region on the Qinghai-Tibetan Plateau (in Chinese)        | 34.40    | 100.40    | 3958         | meadow         | -0.5                    | 500                | -120.9                         |
| Using Eddy Covariance Observations to Determine the Carbon Sequestration Characteristics of Subalpine Forests in the Qinghai Tibet Plateau                                     | 29.28    | 98.69     | 3755         | forest         | 5.25<br>5.76            | 493<br>372         | -332.9<br>-351.02              |
| Carbon dioxide flux characteristics in an <i>Abies fabri</i> mature forest on Gongga Mountain, Sichuan, China (in Chinese)                                                     | 29.95    | 100.99    | 3300         | forest         | 4                       | 1938               | -241.87                        |
| Impact of Drought Stress on Net CO <sub>2</sub> Exchange above an Alpine Grassland Ecosystem in the Central Tibetan Plateau                                                    | 30.49    | 91.06     | 4333         | meadow         | 2                       | 483.2              | 52.4                           |
| Effect of growing season degree days on gross primary productivity and its variation characteristics in alpine shrubland at the southern foot of Qilian mountains (in Chinese) | 37.48    | 101.2     | 3200         | shrub          | -1                      | 580                | 101.89                         |
| Soil CO <sub>2</sub> flux characteristics in alpine meadow of permafrost regions in the upper reaches of the Shule River, Qilianshan Mountains (in Chinese)                    | 38.47    | 98.32     | 3890         | frozen soil    | -4.8                    | 417                | 389.96                         |
| Changing Features of CO <sub>2</sub> Fluxes in Alpine Meadow in the Upper Reaches of Shule River ,Qilianshan (in Chinese)                                                      | 38.41    | 98.316    | 3885         | meadow         | -4                      | 388                | 36.93                          |
| Carbon flux variation characteristics and its influencing factors in an alpine meadow ecosystem on eastern Qinghai—Tibetan plateau (in Chinese)                                | 38.05    | 100.45    | 3033         | meadow         | 0.7                     | 400                | 156                            |
| Soil CO <sub>2</sub> emission and carbon balance in alpine grassland                                                                                                           | 31.23    | 90.01     | 4800         | steppe         | -1.2                    | 380                | 51.17                          |

| Article title                                                                                                                                  | Latitude | Longitude | Altitude (m) | Ecosystem type | Annual temperature (°C) | Precipitation (mm) | NEE (g C/m <sup>2</sup> /Year) |
|------------------------------------------------------------------------------------------------------------------------------------------------|----------|-----------|--------------|----------------|-------------------------|--------------------|--------------------------------|
| ecosystem of Qinghai-Tibet Plateau (in Chinese)                                                                                                |          |           |              |                |                         |                    |                                |
| Diurnal and monthly variation characteristics of CO <sub>2</sub> flux in alpine shrubland of Qinghai-Tibet Plateau (in Chinese)                | 37.61    | 101.31    | 3200         | shrub          | -14.8                   | 580                | 61.9                           |
| CO <sub>2</sub> flux dynamics and its limiting factors in the alpine shrub-meadow and steppe-meadow on the Qinghai-Xizang Plateau (in Chinese) | 37.7     | 101.3     | 3200         | shrub          |                         |                    | -70                            |
|                                                                                                                                                |          |           | 4200         | steppe         | -1.7                    | 570                | 5                              |
| Annual Carbon Dioxide Flux Variations of Alpine Shrub Ecosystem in the Qinghai-Tibet Plateau (in Chinese)                                      | 37.61    | 101.31    | 3200         | shrub          | 9.8                     | 570                | -187                           |
| Characteristics of CO <sub>2</sub> flux over the alpine wetland in the Tibetan Plateau and its control factors (in Chinese)                    | 33.16    | 96.56     | 4167         | wetland        |                         |                    | 126.8                          |
| CO <sub>2</sub> flux in alpine wetland ecosystem on the Qinghai-Tibetan Plateau (in Chinese)                                                   | 37.7     | 101.3     | 3200         | wetland        | -1.7                    | 580                | 86.19                          |
| Study on Carbon-Water Flux and Water Use Efficiency of Alpine Wetland Ecosystem in Qinghai-Tibet Plateau (in Chinese)                          | 37.61    | 101.33    | 3235         | meadow         | -1.7                    | 580                | 120.45                         |
| Net Ecosystem Carbon Dioxide Exchange in Alpine Meadow of Nagchu Region over Qinghai-Xizang Plateau (in Chinese)                               | 31.37    | 91.9      | 4509         | meadow         | -1.3                    | 465.7              | -41.3                          |
| Interannual dynamics and driving mechanism of CO <sub>2</sub> flux in meadow grassland on the north shore of Qinghai Lake (in Chinese)         | 36.95    | 100.85    | 3140         | steppe         | 0.5                     | 391.9              | -63.51                         |
| Variation of CO <sub>2</sub> Flux of Alpine Wetland Ecosystem of <i>Kobresia tibetica</i> Wet Meadow in Lake Qinghai (in Chinese)              | 36.70    | 100.78    | 3228         | wetland        | 2.7                     | 320.14             | 54.55                          |
| Characteristics of CO <sub>2</sub> exchange on different time scales of peat wetland land-atmosphere system in Qinghai Lake basin (in          | 37.74    | 100.09    | 3750         | wetland        | -3.06                   | 462.8              | 209.31                         |

| Article title                                                                                                                                                                                              | Latitude | Longitude | Altitude (m) | Ecosystem type | Annual temperature (°C) | Precipitation (mm) | NEE (g C/m <sup>2</sup> /Year) |
|------------------------------------------------------------------------------------------------------------------------------------------------------------------------------------------------------------|----------|-----------|--------------|----------------|-------------------------|--------------------|--------------------------------|
| Chinese)<br>CO <sub>2</sub> fluxes of artificial grassland in the source region of The Three Rivers on The Qinghai – Tibetan Plateau China (in Chinese)                                                    | 34.41    | 100.43    | 3980         | steppe         | -2.6                    | 513.02             | -49.35                         |
| Variation in net CO <sub>2</sub> exchange, gross primary production and its affecting factors in the planted pasture ecosystem in Sanjiangyuan Region of the Qinghai-Tibetan Plateau of China (in Chinese) | 34.41    | 100.68    | 3980         | steppe         | -0.5                    | 500                | 30.27                          |
| Observations and study on the CO <sub>2</sub> flux in an alpine meadow ecosystem in the upper reaches of the Shule River Basin (in Chinese)                                                                | 38.41    | 98.31     | 3885         | meadow         | -4                      | 378.4              | -43.63                         |
| Long-Term (2007 to 2018) Energy and CO <sub>2</sub> Fluxes over an Agriculture Ecosystem in the Southeastern Margin of the Tibetan Plateau                                                                 | 25.70    | 100.17    | 1977.7       | farmland       | 15.1                    | 1048.1             | -218                           |
| Interannual characteristics and driving mechanism of CO <sub>2</sub> fluxes during the growing season in an alpine wetland ecosystem at the southern foot of the Qilian Mountains                          | 37.58    | 101.33    | 3250         | wetland        | -1.1                    | 490                | -67.5                          |
| Net ecosystem exchange of carbon dioxide fluxes and its driving mechanism in the forests on the Tibetan Plateau                                                                                            | 37.13    | 102.36    | 2523         | forest         | 2.2                     | 505                | -545.99                        |
| Significant CO <sub>2</sub> sink over the Tibet's largest lake: Implication for carbon neutrality across the Tibetan Plateau                                                                               | 31.8     | 88.61     | 4543         | lake           | 0.9                     |                    | -315.5                         |
| Seasonal and Inter-Annual Variations of Carbon Dioxide Fluxes and Their Determinants in an Alpine Meadow                                                                                                   | 32.13    | 102.1     | 3500         | meadow         | 1.5                     | 761                | 94.69                          |

| Article title                                                                                                                                                                                 | Latitude | Longitude | Altitude (m) | Ecosystem type | Annual temperature (°C) | Precipitation (mm) | NEE (g C/m <sup>2</sup> /Year) |
|-----------------------------------------------------------------------------------------------------------------------------------------------------------------------------------------------|----------|-----------|--------------|----------------|-------------------------|--------------------|--------------------------------|
| Effects of precipitation seasonal distribution on net ecosystem CO <sub>2</sub> exchange over an alpine meadow in the southeastern Tibetan Plateau                                            | 27.16    | 100.23    | 3560         | meadow         | 5                       | 1200               | -140.3                         |
| Significant winter CO <sub>2</sub> uptake by saline lakes on the Qinghai-Tibet Plateau                                                                                                        | 37.25    | 100.78    | 3194         | lake           | -0.13                   | 925                | -197.1                         |
| Environmental Controls on Multi-Scale Dynamics of Net Carbon Dioxide Exchange From an Alpine Peatland on the Eastern Qinghai-Tibet Plateau                                                    | 32.76    | 102.5     | 3510         | peatland       | 1.8                     | 746                | -226.61<br>-185.35             |
|                                                                                                                                                                                               | 37.6     | 101.3     | 3200         | meadow         | -1.7                    | 570                | -79.3                          |
| Atmospheric water vapor and soil moisture jointly determine the spatiotemporal variations of CO <sub>2</sub> fluxes and evapotranspiration across the Qinghai-Tibetan Plateau grasslands      | 37.66    | 101.33    | 3400         | shrub          | -0.3                    | 461                | -77.8                          |
|                                                                                                                                                                                               | 37.6     | 101.31    | 3200         | steppe         | -0.8                    | 433.7              | -66.7                          |
|                                                                                                                                                                                               | 36.98    | 100.83    | 3140         | steppe         | 0.8                     | 398.2              | 20.2                           |
|                                                                                                                                                                                               | 30.41    | 91.08     | 4333         | wetland        | 1.3                     | 476.8              | 100.9                          |
| Carbon Sink of a Very High Marshland on the Tibetan Plateau                                                                                                                                   | 30.95    | 88.68     | 4,760        | marshland      | 0.5                     |                    | -187                           |
| The response of CO <sub>2</sub> fluxes to the amplitude of diurnal temperature in alpine meadow during growing season from 2002 to 2016 at the southern foot of Qilian Mountains (in Chinese) | 37.75    | 101.38    | 3600         | meadow         | -1                      | 480                | -230.4                         |
| Seasonal and Interannual Variations of CO <sub>2</sub> Fluxes Over 10 Years in an Alpine Wetland on the Qinghai-Tibetan Plateau                                                               | 37.58    | 101.33    | 3250         | wetland        | -1.1                    | 490                | 120.4                          |
| Net ecosystem carbon budget of a grassland ecosystem in central Qinghai-Tibet Plateau: integrating terrestrial and aquatic carbon fluxes at catchment scale                                   | 34.71    | 92.88     |              | meadow         | -4.5                    | 272                | -39.6                          |
| Carbon and water fluxes in an alpine steppe ecosystem in the                                                                                                                                  | 30.76    | 90.98     | 4730         | steppe         | -0.6                    | 405                | -62.6                          |

| Article title                                                                                                                              | Latitude                | Longitude                 | Altitude (m)         | Ecosystem type | Annual temperature (°C)              | Precipitation (mm)      | NEE (g C/m <sup>2</sup> /Year)            |
|--------------------------------------------------------------------------------------------------------------------------------------------|-------------------------|---------------------------|----------------------|----------------|--------------------------------------|-------------------------|-------------------------------------------|
| Nam Co area of the Tibetan Plateau during two years with contrasting amounts of precipitation                                              |                         |                           |                      |                |                                      |                         | - 32.4                                    |
| Carbon and water fluxes and their coupling in an alpine meadow ecosystem on the northeastern Tibetan Plateau                               | 38.04                   | 100.46                    | 3033                 | meadow         | 1.49                                 | 422.56                  | - 152.89<br>-197.69<br>-160.09<br>-118.49 |
| Interannual and seasonal variations in carbon exchanges over an alpine meadow in the northeastern edge of the Qinghai-Tibet Plateau, China | 38.41                   | 98.31                     |                      | meadow         | -5                                   | 350                     | -130.75<br>-195.83<br>-160.65             |
| Five-Year Measurements of Net Ecosystem CO <sub>2</sub> Exchange at a Fen in the Zoige Peatlands on the Qinghai-Tibetan Plateau            | 33.10                   | 102.65                    | 3460                 | peatland       | 1.5                                  | 350                     | -123.9                                    |
| Water and carbon dioxide exchange of an alpine meadow ecosystem in the northeastern Tibetan Plateau is energy-limited                      | 38.05<br>38.84<br>38.01 | 100.46<br>98.94<br>100.24 | 3033<br>3739<br>4148 | steppe         | 0.6<br>-3.4<br>-4.2                  | 464.1<br>388.6<br>479.9 | -198.7<br>-258.9<br>-105.3                |
| Characteristics of CO <sub>2</sub> , water vapor, and energy exchanges at a headwater wetland ecosystem of the Qinghai Lake                | 37.73                   | 100.08                    | 3753                 | wetland        | 0.1                                  | 400                     | -53.84<br>-211.85<br>-147.27              |
| CO <sub>2</sub> Exchange in an Alpine Swamp Meadow on the Central Tibetan Plateau                                                          | 30.46                   | 91.21                     | 4286                 | meadow         | 2.49<br>2.60<br>2.79<br>3.19<br>3.39 | 475.6                   | -125.45<br>-190.91<br>-158.18<br>-190.91  |
| Diurnal and Seasonal Variations in the Net Ecosystem CO <sub>2</sub> Exchange of a Pasture in the Three-River Source Region of             | 34.41                   | 100.68                    | 3980                 | meadow         | -0.5                                 | 500                     | -140.01                                   |
